# Supplementary material
Source: HighWire-hosted journal article supplement (http://molpharm.aspetjournals.org/highwire/filestream/76485/field_highwire_adjunct_files/2/SupFig3.pdf)

**A**

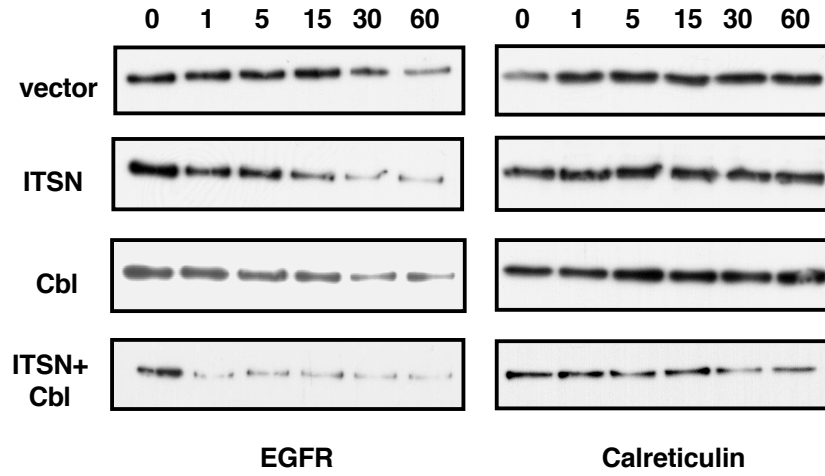

**B**

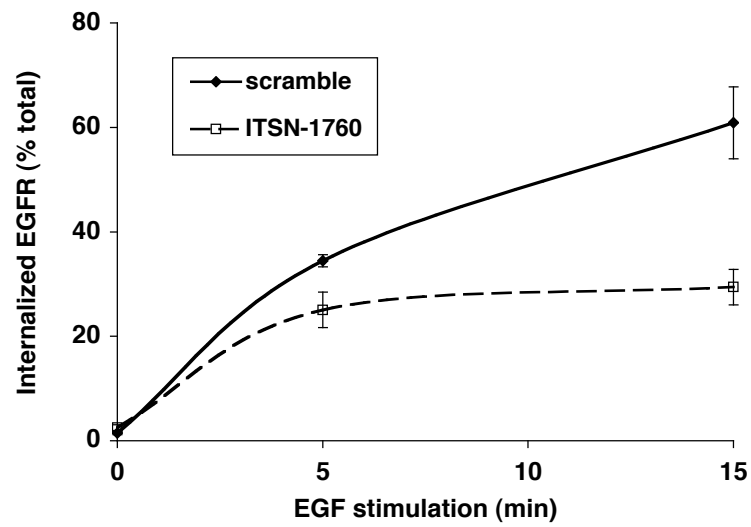

Supplement: SupFig3.pdf [file SupFig3.pdf]
